# Supplementary material
Source: publisher figshare collection journal article supplement (https://plos.figshare.com/articles/dataset/_/118985)
Supplement: Supplementary file [file 1]

### Supplementary Table S1

Specimens collected at the population level are listed with population size but only a single citation is given here. Due to the conservation concerns of several fragmented, highly endangered populations, geographical coordinates have not been provided. For the herbarium specimens, information available on the label of each specimen is provided

**Table S1. Specimens examined.** List of specimens examined for the morphometric analysis and GenBank accession numbers of the samples used in the molecular analysis.

| Country            | Number of individuals | Locality                                                                                     | Altitude (m) | Voucher           |            |                        | Herbaria | GeneBank Accessions |          | Sequence Code |
|--------------------|-----------------------|----------------------------------------------------------------------------------------------|--------------|-------------------|------------|------------------------|----------|---------------------|----------|---------------|
|                    |                       |                                                                                              |              | Collection no.    | Date       | Collector              |          | ITS                 | trnL-F   |               |
| <i>T. contorta</i> |                       |                                                                                              |              |                   |            |                        |          |                     |          |               |
| Afghanistan        | 1                     | Nuristan                                                                                     | 2235         | 1979, L. Edelberg | 6/7/1949   | DerinElasoon           | K        | -                   | -        | -             |
| Pakistan           | 15                    | Azad Kashmir, Neelam Valley                                                                  | 2300         | A25061            | 25/05/2005 | A Shah                 | KUN      | -                   | -        | -             |
| Pakistan           | 17                    | F.A.T.A. Kurram Valley                                                                       | 2439         | A25324            | 15/08/2006 | A Shah                 | KUN      | JX680614            | JX680646 | KV10          |
| Pakistan           | 15                    | F.A.T.A. Tirah                                                                               | 2000         | A25309            | 30/06/2006 | A Shah                 | KUN      | JX680613            | JX680645 | TH15          |
| Pakistan           | 15                    | N.W.F.P, Chitral                                                                             | 2500         | A25275            | 4/07/2006  | A Shah                 | KUN      | JX680607            | JX680636 | CH5           |
| Pakistan           | 15                    | N.W.F.P, Hazara                                                                              | 2200         | A25208            | 06/05/2005 | A Shah                 | KUN      | JX680610            | JX680641 | HZ3           |
| Pakistan           | 15                    | N.W.F.P, Palas Valley                                                                        | 2000         | A25252            | 15/06/2006 | A Shah                 | KUN      | JX680611            | JX680642 | PV2           |
| Pakistan           | 15                    | Punjab, JhikkaGali                                                                           | 2122         | A25117            | 31/05/2005 | A Shah                 | KUN      | -                   | -        | -             |
| India              | 1                     | Bushreo Pass, Kulu, Punjab                                                                   | 2898         | 3119              | 8/11/1931  | Walter Koelz           | E        | -                   | -        | -             |
| India              | 1                     | East Almora division, Kumaon                                                                 | 2745         | 2261              | 22/05/1933 | Biskam                 | E        | -                   | -        | -             |
| India              | 1                     | Himachal Pradesh, between Camp1 and Camp2 above Bathaad in the Great Himalayan National Park | 2865         | 1912              | 09/1993    | Howick, C & McNamara A | E        | EF680236            | EF680256 | FU1           |
| India              | 1                     | Kashmir, Kootihar valley                                                                     | 2430         | 85                | 04/12/1896 | H. H. Johnston         | E        | -                   | -        | -             |
| India              | 1                     | Kashmir, Sind valley, 2-3 miles W of Sonamarg                                                | 2440         | 56/622            | 31/08/1956 | O. Polunin             | E        | -                   | -        | -             |
| India              | 1                     | TrijugiNarainet, Garhwal                                                                     | 2242         | 8894              | 16/10/1938 | Kirt Ram               | E        | -                   | -        | -             |
| India              | 20                    | Uttarakhand: Chamoli                                                                         | 2200         | Yuhy-74           | 5/08/2007  | Yu Hyaing              | KUN      | HM590974            | HM591152 | IN74          |
| Nepal              | 23                    | Baglung, Bobang                                                                              | 2548         | RC1587            | 12/05/2010 | RC Poudel              | KUN      | JX680608            | JX680637 | BB1           |
| Nepal              | 24                    | Darchula, Sitola                                                                             | 2664         | RC1641            | 21/05/2010 | RC Poudel              | KUN      | JX680612            | JX680643 | DO16          |
| Nepal              | 18                    | Doti, Bichapani,                                                                             | 3090         | RC1865            | 03/06/2011 | RC Poudel              | KUN      | -                   | -        | -             |
| Nepal              | 12                    | Gorkha, Lihi                                                                                 | 2907         | RC1822            | 21/02/2011 | RC Poudel              | KUN      | -                   | -        | -             |
| Nepal              | 20                    | Jumla, Depalgaun                                                                             | 2473         | RC1652            | 25/05/2010 | RC Poudel              | KUN      | JX680605            | JX680644 | JD1           |
| Nepal              | 21                    | Manang, Ghattekhol                                                                           | 2690         | RC1339            | 03/04/2010 | RC Poudel              | KUN      | JX680606            | JX680635 | MC21          |
| Nepal              | 20                    | Manang, Gho                                                                                  | 2264         | RC1370            | 04/04/2010 | RC Poudel              | KUN      | -                   | -        | -             |
| Nepal              | 20                    | Manang, Temang                                                                               | 2643         | RC1340            | 03/04/2010 | RC Poudel              | KUN      | -                   | -        | -             |
| Nepal              | 20                    | Mustang                                                                                      | 2447         | RC1493            | 24/04/2010 | RC Poudel              | KUN      | -                   | -        | -             |
| China              | 20                    | Jilong, Xizang                                                                               | 2395         | GLM081630         | 14/09/2008 | LM Gao & J Liu         | KUN      | JX680609            | JX680640 | GL11          |
| China*             | 1                     | Xizhang, Jilong-Yin                                                                          | 2300         | 7032              | 20/7/1975  | Qing-Zhang team        | KUN      | -                   | -        | -             |
| Total specimens    | 325 +8=333            |                                                                                              |              |                   |            |                        |          |                     |          |               |

| Country               | Number of individuals | Locality                                                          | Altitude (m) | Voucher             |            |                                                       | Herbaria | GeneBank Accessions |          | Sequence Code |
|-----------------------|-----------------------|-------------------------------------------------------------------|--------------|---------------------|------------|-------------------------------------------------------|----------|---------------------|----------|---------------|
|                       |                       |                                                                   |              | Collection no.      | Date       | Collector                                             |          | ITS                 | trnL-F   |               |
| <i>T. mairei</i>      |                       |                                                                   |              |                     |            |                                                       |          |                     |          |               |
| Nepal                 | 14                    | Kavre                                                             | 2030         | RC1258              | 22/03/2010 | RC Poudel                                             | KUN      | JX680615            | JX680649 | KD6           |
| Nepal                 | 20                    | Sindhuli                                                          | 1756         | RC1768              | 07/02/2011 | RC Poudel                                             | KUN      | JX680617            | JX680647 | SM1           |
| Nepal                 | 5                     | Sindhuli                                                          | 1450         | RC1803              | 09/02/2011 | RC Poudel                                             | KUN      | JX680616            | JX680648 | SR5           |
| Bhutan                | 1                     | Between Punakha and Tashitang                                     | 1500         | 7368                | 10/3/1991  | J.R.I. Wood                                           | E        | -                   | JX680650 | BT5           |
| India                 | 1                     | Khasia, Kala Panu?,                                               | 1524         | 1337                | 27/06/1950 | Hooker                                                | K        | -                   | -        | -             |
| India                 | 1                     | Maoplang, Khasia                                                  | 1800         | 38308               | 16/06/1885 | Clarke                                                | E        | JX680618            | JX680654 | IN1           |
| India                 | 1                     | Nunghuai, Khasia hills                                            | 1524         | 1885                | 1/11/1885  | C. Mann                                               | K        | -                   | -        | -             |
| Myanmar               | 1                     | Mindat District, Hilawng ridge                                    | 1116         | 1983                | 7/11/1962  | U. Mg Gale                                            | E        | JX680619            | JX680653 | BU1           |
| Myanmar               | 1                     | West Central: Esakan                                              | 1952         | 21901               | 31/03/1956 | F. Kingdon Ward                                       | K        | -                   | -        | -             |
| Vietnam               | 1                     | Lam Dong, Don Duong Distr., Ho Tien, Lake of Angels, first site   | 1430         | 162                 | 8/9/2001   | M. F. Gardner, P. Thomas, N. D. T. Luu, & N. V. Chiet | E        | -                   | -        | -             |
| Vietnam               | 1                     | Lam Dong, DucTrong Distr., Nui Voi, XaHiep An (Elephant Mountain) | 1500         | 200                 | 17/09/2001 | P. Thomas, N. D. T. Luu, & N. V. Chi                  | E        | -                   | -        | -             |
| Vietnam               | 1                     | Lam Dong, DucTrong Distr., XaHiep An (Elephant Mountain)          | 1420         | 64                  | 31/08/2001 | M. F. Gardner, P. Thomas, N. D. T. Luu, & N. V. Chiet | E        | -                   | -        | -             |
| Vietnam               | 1                     | Lam Dong, Thanh Pho Dalat, XaXuanTho (commune), XuanTho station   | 1227         | 39                  | 29/08/2001 | M. F. Gardner, P. Thomas, N. D. T. Luu, & N. V. Chiet | E        | JX680620            | JX680655 | VN28          |
| China                 | 1                     | Fujian, Fuqing                                                    | 707          | ZHXM0506141         | 07/08/2005 | Z Xue-Mei                                             | KUN      | -                   | -        | -             |
| China                 | 1                     | Guangxi, Jin Xiu                                                  | 1002         | GLM 05-960          | 9/12/2005  | LM Gao                                                | KUN      | -                   | -        | -             |
| China                 | 1                     | Guizhou, Nayong                                                   | 1580         | MMO-03-417          | 19/9/2003  | M Moller                                              | KUN      | -                   | -        | -             |
| China                 | 1                     | Guizhou, Furongba                                                 | 950          | MMO-03-403          | 17/9/2003  | M Moller                                              | KUN      | JX680622            | JX680652 | LS20          |
| China                 | 1                     | Guizhou, Guochang                                                 | 790          | MMO-03-370          | 17/9/2003  | M Moller                                              | KUN      | -                   | -        | -             |
| China*                | 1                     | Yunnan (?) (Nord)                                                 | 750          | s.n                 | x-5-19xxx  | E.E.Maire                                             | E        | -                   | -        | -             |
| China                 | 1                     | Yunnan (Nord), Tie-Chang-Keou                                     | 650          | 131 (?)             | x-9-19xxx  | E.E.Maire                                             | KUN      | -                   | -        | -             |
| China                 | 1                     | Yunnan (Nord), Tie-Tchang-Keow                                    | 700          | s.n. (acc. No.129)  | x-9-19xxx  | E.E.Maire                                             | KUN      | -                   | -        | -             |
| China                 | 1                     | Yunnan, Ganhe village                                             | 1300         | GLM-07647           | 20/05/2007 | LM Gao                                                | KUN      | -                   | -        | -             |
| China                 | 1                     | Yunnan, Weixin                                                    | 1326         | GLM-07614           | 20/05/2007 | LM Gao                                                | KUN      | -                   | -        | -             |
| China                 | 1                     | Zhejiang, Linan                                                   | 349          | ZHXM050696          | 30/06/2005 | Z Xue-Mei                                             | KUN      | JX680621            | JX680651 | JX5           |
| Total specimens       | 39+21=60              |                                                                   |              |                     |            |                                                       |          |                     |          |               |
| <i>T. wallichiana</i> |                       |                                                                   |              |                     |            |                                                       |          |                     |          |               |
| Nepal                 | 20                    | Baglung                                                           | 2328         | RC1571              | 10/05/2010 | RC Poudel                                             | KUN      | JX680629            | JX680663 | BH10          |
| Nepal                 | 14                    | Dolakha, Suspachhemawati                                          | 2340         | RC1215              | 15/03/2010 | RC Poudel                                             | KUN      | -                   | -        | -             |
| Nepal                 | 20                    | Gorkha                                                            | 2170         | RC1287              | 27/03/2010 | RC Poudel                                             | KUN      | JX680628            | JX680661 | GK5           |
| Nepal                 | 20                    | Kaski, Lalka danda                                                | 2280         | RC1401              | 19/04/2010 | RC Poudel                                             | KUN      | JX680626            | JX680659 | KC1           |
| Nepal                 | 24                    | Kaski, Ghandruk                                                   | 2210         | RC1431              | 22/04/2010 | RC Poudel                                             | KUN      | -                   | -        | -             |
| Nepal*                | 1-                    | Kathmandu, Shivapuri                                              | 2400         | 6054 (a), (sheet 1) | 25/12/1904 | Wall. Cat.                                            | K        | -                   | -        | -             |
| Nepal                 | 20                    | Kathmandu, Shivapuri                                              | 2450         | RC1071              | 27/02/2010 | RC Poudel & LM Gao                                    | KUN      | -                   | -        | -             |
| Nepal                 | 7                     | Kavre                                                             | 2050         | RC1266              | 22/03/2010 | RC Poudel                                             | KUN      | -                   | -        | -             |
| Nepal                 | 20                    | Lamjung, Bhujung                                                  | 1950         | RC1834              | 27/02/2011 | RC Poudel                                             | KUN      | -                   | -        | -             |
| Nepal                 | 20                    | Myagdi                                                            | 2537         | RC1523              | 30/04/2010 | RC Poudel                                             | KUN      | -                   | -        | -             |
| Nepal                 | 24                    | Myagdi, Ghodepani                                                 | 3050         | RC1467              | 23/04/2010 | RC Poudel                                             | KUN      | -                   | -        | -             |

| Country                | Number of individuals | Locality                                                | Altitude (m) | Voucher        |             |                                    | Herbaria | GeneBank Accessions |          | Sequence Code |
|------------------------|-----------------------|---------------------------------------------------------|--------------|----------------|-------------|------------------------------------|----------|---------------------|----------|---------------|
|                        |                       |                                                         |              | Collection no. | Date        | Collector                          |          | ITS                 | trnL-F   |               |
| Nepal                  | 4                     | Ramechhap, Deurali                                      | 2906         | RC1229         | 18/03/2010  | RC Poudel                          | KUN      | -                   | -        | -             |
| Nepal                  | 19                    | Rasuwa                                                  | 2383         | RC1203         | 12/03/2010  | RC Poudel                          | KUN      | JX680625            | JX680658 | RT8           |
| Nepal                  | 20                    | Sankhuwasabha, Tamaphok                                 | 2799         | RC1740         | 02/02/2011  | RC Poudel                          | KUN      | -                   | -        | -             |
| Nepal                  | 4                     | Sindhupalchok, Helambu                                  | 2502         | RC1818         | 12/02/2011  | RC Poudel                          | KUN      | -                   | -        | -             |
| Nepal                  | 18                    | Sindhupalchok, Listi                                    | 2370         | RC1233         | 21/03/2010  | RC Poudel                          | KUN      | -                   | -        | -             |
| Nepal                  | 20                    | Solukhumbu                                              | 2623         | ND2            | 9/11/2005   | RC Poudel                          | E        | JX680624            | JX680657 | ND16          |
| Nepal                  | 14                    | Taplejung                                               | 2945         | RC1683         | 04/06/2010  | RC Poudel                          | KUN      | JX680627            | JX680660 | TK1           |
| India                  | 1                     | Barail range, Naga hills                                | 2900         | 7755           | 23/12/1927  | Kingdon ward                       | K        | -                   | -        | -             |
| India                  | 1                     | Bengal, Batassi                                         | 1981         | 5D             | 4/6/1960    | J.M. Cowan                         | E        | -                   | -        | -             |
| India                  | 1                     | Chiban, Assam                                           | 2000         | 8090           | 11/4/1928   | Kingdon ward,                      | K        | -                   | -        | -             |
| India                  | 1                     | Delei valley, Assam                                     | 2743         | 8594           | 26/08/1928  | Kingdon ward,                      | K        | -                   | -        | -             |
| India                  | 1                     | Jakpho, Naja Hills                                      | 2590         | 41238B         | 25/10/1885  | C.B. Clarke                        | K        | -                   | -        | -             |
| India                  | 1                     | Manipur, Sirohifarar                                    | 2130         | 6493           | -           | G Watt                             | E        | -                   | -        | -             |
| India                  | 1                     | Manipur, on the eastern frontier of India, Jopvo        | 2440         | 6208           | 09/02/1882  | G Watt                             | K        | -                   | -        | -             |
| India                  | 1                     | Manipur, on the eastern frontier of India, Seriphar(s)i | 3050         | 5955           | 17/01/1882  | G Watt                             | K        | -                   | -        | -             |
| India                  | 1                     | Manipur, Sriobinfurar, on the eastern frontier of India | 2135         | 6493           | 13/04/1882  | G Watt                             | K        | -                   | -        | -             |
| India                  | 1                     | Sikkim, Tonglo                                          | 2743         | 7458           | 11/1879     | J.S. Gamble                        | K        | -                   | -        | -             |
| India                  | 1                     | Sikkim, Tonglo                                          | 2895         | 2674           | 11/1874     | J.S. Gamble                        | E        | -                   | -        | -             |
| India                  | 1                     | West Bengal, Darjeeling                                 | 2270         | 1119           | 5/8/1992    | D.G.Long et al.                    | E        | -                   | -        | -             |
| India                  | 1                     | West Bengal, Singalila Range                            | 2562         | 148            | 15/05/1965  | F.de Vos&E.G.Corbett               | E        | -                   | -        | -             |
| Bhutan                 | 1                     | Dochu-La-Pass                                           | 3300         | 7349           | 24/03/ 1983 | H. Ern                             | E        | -                   | -        | -             |
| Bhutan                 | 1                     | Thimpu district, summit of Dochong La                   | 3110         | 4417           | 13/04/1982  | Grierson & Long                    | E        | JX680623            | JX680656 | BT1           |
| Bhutan                 | 1                     | Thimpu district, valley above Taba                      | 2520         | 999            | 13/05/1979  | Grierson & Long                    | E        | -                   | -        | -             |
| Bhutan                 | 1                     | Tunle La near KingaRapden                               | 3352         | 18672          | 10/4/1949   | F. Ludlow, G. Sherriff & G. Taylor | E        | -                   | -        | -             |
| China                  | 11                    | Xizang, Bomi                                            | 2570         | GLM-082079     | 27/09/2008  | LM Gao                             | KUN      | -                   | -        | -             |
| China                  | 12                    | Xizang, Chayu                                           | 2650         | GLM-082127     | 29/09/2008  | LM Gao                             | KUN      | JX680632            | JX680662 | CY01          |
| China                  | 11                    | Xizang, Cuona                                           | 2820         | GLM-081809     | 23/09/2008  | LM Gao                             | KUN      | JX680631            | JX680665 | CN17          |
| China                  | 12                    | Xizang, Yadong                                          | 2700         | GLM-081728     | 19/09/2008  | LM Gao                             | KUN      | JX680630            | JX680664 | XY24          |
| China                  | 21                    | Yunnan, Gongshan                                        | 1960         | GLM-2301       | 17/8/2003   | LM Gao                             | KUN      | EF680253            | EF680273 | GS1           |
| China                  | 10                    | Yunnan, Lushui                                          | 2900         | Liuj-09291     | 20/03/2009  | J Liu                              | KUN      | JX680634            | JX680666 | LK01          |
| China                  | 12                    | Yunnan, Yingjiang                                       | 2612         | Liuj-08041     | 14/12/2009  | J Liu                              | KUN      | JX680633            | JX680667 | YJ01          |
| Nepal                  | 1                     | Sindupalchok, Listi ( <b>hybrid</b> <sup>o</sup> )      | 2558         | RC1250         | 21/03/2010  | RC Poudel                          | KUN      | -                   | JX680638 | SL18          |
| Nepal                  | 1                     | Sindupalchok, Listi ( <b>hybrid</b> <sup>o</sup> )      | 2558         | RC1251         | 21/03/2010  | RC Poudel                          | KUN      | -                   | JX680639 | SL19          |
| <b>Total specimens</b> |                       | <b>379+18=397</b>                                       |              |                |             |                                    |          |                     |          |               |

**Total samples      790**

\* Type specimen, <sup>o</sup> *T. wallichiana* x *T. contorta*
