# Supplementary material
Source: publisher figshare collection journal article supplement (https://plos.figshare.com/articles/dataset/_/118985)
Supplement: Supplementary file [file 1]

Supplementary Table S4

**Table S4. ITS sequence matrix.** Variable position of the nrDNA sequences (ITSLeu-4) of 33 accessions sampled across the distribution range of all three species of *Taxus*.

| Species                  | Country/Locality/Code            | Positions |   |   |   |   |   |   |   |   |   |   |   |   |   |   |   |   |   |   |   |   |   |   |   |   |   |   |   |
|--------------------------|----------------------------------|-----------|---|---|---|---|---|---|---|---|---|---|---|---|---|---|---|---|---|---|---|---|---|---|---|---|---|---|---|
|                          |                                  | 1         | 1 | 1 | 1 | 1 | 1 | 2 | 2 | 2 | 3 | 3 | 3 | 3 | 3 | 3 | 4 | 4 | 5 | 5 | 5 | 5 | 6 | 7 | 7 | 1 | 1 | 1 | 1 |
| <i>T. contorta</i>       | Pakistan: Kurram Valley, KV10    | T         | T | T | T | T | C | T | - | T | T | C | T | C | C | C | T | A | A | G | T | T | G | A | T | T | G | T |   |
|                          | Pakistan: Tirah, TH15            | .         | . | . | . | . | . | . | - | . | . | . | . | . | . | . | . | . | . | . | . | . | . | . | . | . | . | . | . |
|                          | Pakistan: Chitral, CH5           | .         | . | Y | . | . | . | . | - | . | . | . | . | . | . | . | . | . | . | . | . | . | . | . | . | . | . | . | . |
|                          | Pakistan: Palas valley, PV2      | .         | . | . | . | . | . | . | - | . | . | . | . | . | . | . | . | . | . | . | . | . | . | . | . | . | . | . | . |
|                          | Pakistan: Hazara, HZ3            | .         | . | . | . | . | . | . | - | . | . | . | . | . | . | . | . | . | . | . | . | . | . | . | . | . | . | . | . |
|                          | India: Himanchal Pradesh, FU1    | .         | . | . | . | . | . | . | - | . | . | . | . | . | . | . | . | . | . | . | . | . | . | . | . | . | . | . | . |
|                          | India: Uttranchal, Chamoli, IN74 | .         | . | . | . | . | . | . | - | . | . | . | . | . | . | . | . | . | . | . | . | . | . | . | . | . | . | . | . |
|                          | Nepal: Darchula, DO16            | .         | . | . | . | . | . | . | - | . | . | . | . | . | . | . | . | . | . | . | . | . | . | . | . | . | . | . | . |
|                          | Nepal: Jumla, JD1                | .         | . | . | . | . | . | . | - | . | . | . | . | . | . | . | . | . | . | . | . | . | . | . | . | . | . | . | . |
|                          | Nepal: Manang, MC21              | .         | . | . | . | . | . | . | - | . | . | . | . | . | . | . | . | . | . | . | . | . | . | . | . | . | . | . | . |
|                          | Nepal: Baglung, BB1              | .         | . | . | . | . | . | . | - | . | . | . | . | . | . | . | . | . | . | . | . | . | . | . | . | . | . | . | . |
|                          | China: Tibet, Jilong, GL11       | .         | . | . | . | . | . | . | - | . | . | . | . | . | . | . | . | . | . | . | . | . | . | . | . | . | . | . | . |
| <i>T. mairei</i>         | Nepal: Kavre, KD6                | C         | C | . | A | A | . | C | - | C | C | . | C | T | T | . | C | C | C | T | . | . | T | C | C | C | T | G |   |
|                          | Nepal: Sindhuli, SR5             | C         | C | . | A | A | . | C | - | C | C | . | C | T | T | . | C | C | C | T | . | . | T | C | C | C | T | G |   |
|                          | Nepal: Sindhuli, SM1             | C         | C | . | A | A | . | C | - | C | C | . | C | T | T | . | C | C | C | T | . | . | T | C | C | C | T | G |   |
|                          | India: Meghalaya, IN1            | C         | C | . | A | A | . | C | - | C | C | . | C | T | T | . | C | C | C | T | . | . | T | C | C | C | T | G |   |
|                          | Myanmar: Hilawng ridge, BU1      | C         | C | . | A | A | . | . | - | C | C | . | C | T | T | . | C | C | C | T | . | . | T | C | C | C | T | G |   |
|                          | Vietnam: Lam Dong, VN28          | C         | C | . | A | A | . | . | - | C | . | . | . | T | T | . | C | C | C | T | . | . | T | C | . | C | T | G |   |
|                          | China: Jiangxi, JX5              | C         | C | . | A | A | . | . | - | C | . | . | . | T | T | . | C | C | C | T | . | . | T | C | . | C | T | G |   |
|                          | China: Guizhou, LS20             | C         | C | . | A | A | . | C | - | C | . | . | . | T | T | . | C | C | C | T | . | . | T | C | . | C | T | G |   |
| <i>T. wallichiana</i>    | Nepal: Baglung, BH10             | .         | . | . | . | A | G | . | T | . | . | A | . | T | T | T | . | C | C | . | C | . | C | . | C | T | G | G |   |
|                          | Nepal: Kaski, KC1                | .         | . | . | . | A | G | . | T | . | . | A | . | T | T | T | . | C | C | . | C | . | C | . | C | T | G | G |   |
|                          | Nepal: Gorkha, GK5               | .         | . | . | . | A | G | . | T | . | . | A | . | T | T | T | . | C | C | . | C | . | C | . | C | T | G | G |   |
|                          | Nepal: Rasuwa, RT8               | .         | . | . | . | A | G | . | T | . | . | A | . | T | T | T | . | C | C | . | C | . | C | . | C | T | G | G |   |
|                          | Nepal: Sagarmatha, ND16          | .         | . | . | . | A | G | . | T | . | . | A | . | T | T | T | . | C | C | . | C | . | C | . | C | T | G | G |   |
|                          | Nepal: Taplejung, TK1            | .         | . | . | . | A | G | . | T | . | . | A | . | T | T | T | . | C | C | . | C | . | C | . | C | T | G | G |   |
|                          | Bhutan: Thimpu, BT1              | .         | . | . | . | A | G | . | T | . | . | A | . | T | T | T | . | C | C | . | C | . | C | . | C | T | G | G |   |
|                          | China: Xizang, Yadong, XY24      | .         | . | . | . | A | G | . | T | . | . | A | . | T | T | T | . | C | C | . | C | . | C | . | C | T | G | G |   |
|                          | China: Xizang, Cuona, CN17       | .         | . | . | . | A | G | . | T | . | . | A | . | T | T | T | . | C | C | . | C | C | . | C | . | C | T | G |   |
|                          | China: Xizang, Chayu, CY01       | .         | . | . | . | A | G | . | T | . | . | A | . | T | T | T | . | C | C | . | C | . | C | . | C | T | G | G |   |
|                          | China: Yunnan, Gongshan,GS1      | .         | . | . | . | A | G | . | T | . | . | A | . | T | T | T | . | C | C | . | C | . | C | . | C | T | G | G |   |
|                          | China: Yunnan, Lushi, LK01       | .         | . | . | . | A | G | . | T | . | . | A | . | T | T | T | . | C | C | . | C | . | C | . | C | T | G | G |   |
|                          | China: Yunnan, Yingjiang, YJ01   | .         | . | . | . | A | G | . | T | . | . | A | . | T | T | T | . | C | C | . | C | . | C | . | C | T | G | G |   |
| <b>Hybrid individual</b> | Nepal: Sindhupalchok, SL18       | .         | . | . | . | W | S | . | Y | . | . | M | . | Y | Y | Y | . | M | M | . | Y | . | . | M | . | Y | K | K |   |
| <b>Hybrid individual</b> | Nepal: Sindhupalchok, SL19       | .         | . | . | . | W | S | . | Y | . | . | M | . | Y | Y | Y | . | M | M | . | Y | . | . | M | . | Y | K | K |   |

Character states shown in comparison to accession *T. contorta*, KV10, identical states indicated by "." in other accessions, "-" = indel.
