# Supplementary material
Source: publisher figshare collection journal article supplement (https://plos.figshare.com/articles/dataset/_/118985)
Supplement: Supplementary file [file 1]

# Supplementary Table S5

**Table S5. *trnL-F* sequence matrix.** Variable position of the cpDNA sequences (*trnL-F*) of 36 accessions sampled across the distribution range of all three species of *Taxus*.

| Species               | Country/Locality/Code            | Position |   |   |   |   |   |   |   |                |   |   |   |                |   |   |
|-----------------------|----------------------------------|----------|---|---|---|---|---|---|---|----------------|---|---|---|----------------|---|---|
|                       |                                  | 1        | 2 | 2 | 3 | 3 | 3 | 3 | 4 | 5              | 5 | 6 | 6 | 7              | 7 | 7 |
|                       |                                  | 0        | 3 | 9 | 1 | 2 | 3 | 4 | 4 | 1              | 4 | 9 | 8 | 5              | 7 | 5 |
|                       |                                  | 2        | 8 | 7 | 4 | 8 | 8 | 5 | 8 | 3              | 2 | 0 | 8 | 6              | 0 | 5 |
| <i>T. contorta</i>    | Pakistan: Kurram Valley, KV10    | C        | A | G | T | T | C | G | G | 0              | A | C | G | 0              | C | G |
|                       | Pakistan: Tirah, TH15            | .        | . | . | . | . | . | . | . | 0              | . | . | . | 0              | . | . |
|                       | Pakistan: Chitral, CH5           | .        | . | . | . | . | . | . | . | 0              | . | . | . | 0              | . | . |
|                       | Pakistan: Palas valley, PV2      | .        | . | . | . | . | . | . | . | 0              | T | . | . | 0              | . | . |
|                       | Pakistan: Hazara, HZ3            | .        | . | . | . | . | . | T | . | 0              | . | . | . | 0              | . | . |
|                       | India: Himanchal Pradesh, FU1    | .        | . | . | . | . | . | . | . | 0              | . | . | . | 0              | . | . |
|                       | India: Uttranchal, Chamoli, IN74 | .        | . | . | . | . | . | . | . | 0              | . | . | . | 0              | . | . |
|                       | Nepal: Darchula, DO16            | .        | . | . | . | . | . | . | . | 0              | . | . | . | 0              | . | . |
|                       | Nepal: Jumla, JD1                | .        | . | . | . | . | . | . | . | 0              | . | . | . | 0              | . | . |
|                       | Nepal: Manang, MC21              | .        | . | . | . | . | . | . | . | 0              | . | . | . | 0              | A | . |
|                       | Nepal: Baglung, BB1              | .        | . | . | . | . | . | . | . | 0              | . | . | . | 0              | . | . |
|                       | China: Tibet, Jilong, GL11       | A        | . | . | . | . | . | . | . | 0              | . | . | . | 0              | . | . |
| <i>T. mairei</i>      | Nepal: Kavre, KD6                | .        | . | T | . | G | . | . | . | 0              | . | A | . | 1 <sup>d</sup> | . | . |
|                       | Nepal: Sindhuli, SR5             | .        | . | T | . | G | . | . | . | 0              | . | A | . | 1 <sup>d</sup> | . | . |
|                       | Nepal: Sindhuli, SM1             | .        | . | T | . | G | . | . | . | 0              | . | A | . | 1 <sup>d</sup> | . | . |
|                       | Bhutan: Punakha-Tashitang, BT5   | .        | . | T | . | G | . | . | . | 0              | . | A | . | 1 <sup>d</sup> | . | . |
|                       | India: Meghalaya, IN1            | .        | . | T | . | G | . | . | . | 0              | . | A | . | 1 <sup>d</sup> | . | . |
|                       | Myanmar: Hilawng ridge, BU1      | .        | . | T | . | G | . | . | . | 0              | . | A | . | 1 <sup>d</sup> | . | . |
|                       | Vietnam: Lam Dong, VN28          | .        | . | T | . | G | . | . | . | 0              | . | A | . | 1 <sup>d</sup> | . | . |
|                       | China: Jiangxi, JX5              | .        | . | T | . | G | . | . | . | 0              | . | A | . | 1 <sup>d</sup> | . | . |
|                       | China: Guizhou, LS20             | .        | . | T | . | G | . | . | . | 0              | . | A | . | 1 <sup>d</sup> | . | . |
|                       | Nepal: Baglung, BH10             | .        | . | T | . | G | T | . | . | 1 <sup>b</sup> | . | A | T | 1 <sup>e</sup> | A | T |
|                       | Nepal: Kaski, KC1                | .        | . | T | G | G | T | . | T | 1 <sup>a</sup> | . | A | T | 1 <sup>e</sup> | A | T |
|                       | Nepal: Gorkha, GK5               | .        | . | T | . | G | T | . | T | 1 <sup>a</sup> | . | A | T | 1 <sup>e</sup> | A | T |
| <i>T. wallichiana</i> | Nepal: Rasuwa, RT8               | .        | C | T | . | T | T | . | T | 1 <sup>a</sup> | . | A | T | 1 <sup>e</sup> | A | T |
|                       | Nepal: Sagarmatha, ND16          | .        | . | T | . | G | T | . | T | 1 <sup>a</sup> | . | A | T | 1 <sup>e</sup> | A | T |
|                       | Nepal: Taplejung, TK1            | .        | . | T | . | G | T | . | T | 1 <sup>a</sup> | . | A | T | 1 <sup>e</sup> | A | T |
|                       | Bhutan: Thimpu, BT1              | .        | . | T | . | G | T | . | T | 1 <sup>a</sup> | . | A | T | 1 <sup>e</sup> | A | T |
|                       | China: Xizang, Yadong, XY24      | .        | . | T | . | G | T | . | . | 0              | . | A | T | 1 <sup>e</sup> | A | T |
|                       | China: Xizang, Cuona, CN17       | .        | . | T | . | G | T | . | . | 0              | . | A | T | 1 <sup>e</sup> | A | T |
|                       | China: Xizang, Chayu, CY01       | .        | . | T | . | G | T | . | . | 1 <sup>a</sup> | . | A | T | 1 <sup>e</sup> | A | T |
|                       | China: Yunnan, Gongshan, GS1     | .        | . | T | . | G | T | . | . | 1 <sup>c</sup> | . | A | T | 1 <sup>e</sup> | A | T |
|                       | China: Yunnan, Lushi, LK01       | .        | . | T | . | G | T | . | T | 1 <sup>a</sup> | . | A | T | 1 <sup>e</sup> | A | T |
|                       | China: Yunnan, Yingjiang, YJ01   | .        | . | T | . | G | T | . | T | 1 <sup>a</sup> | . | A | T | 1 <sup>e</sup> | A | T |
| Hybrid individual     | Nepal: Sindhupalchok, SL18       | .        | . | . | . | . | . | . | . | 0              | . | . | . | 0              | . | . |
| Hybrid individual     | Nepal: Sindhupalchok, SL19       | .        | . | . | . | . | . | . | . | 0              | . | . | . | 0              | . | . |

Character states shown in comparison to accession *T. contorta*, KV10, identical states indicated by "." in other accessions. 0= absent; 1<sup>a</sup>= AGAAAGATCAAATATTATTA;

1<sup>b</sup>= AGAAAGATCAAATATTATTAAGAAAGATCAAATATTATTA; 1<sup>c</sup>= AGAAATATCAAATATTATTA; 1<sup>d</sup>=AAAAAA-G; 1<sup>e</sup>=AAAAAAAG
