# Supplementary material
Source: publisher figshare collection journal article supplement (https://plos.figshare.com/articles/dataset/_/118985)
Supplement: Supplementary file [file 1]

### Supplementary Table S6

**Table S6. Statistics of univariate ANOVA among *Taxus* of the Hindu Kush-Himalaya and adjacent regions for 19 bioclimatic variables.**

| Variables |                 | Sum of Squares | df | Mean Square | F      | Sig.  | Tukey <i>Post-hoc</i> test              |
|-----------|-----------------|----------------|----|-------------|--------|-------|-----------------------------------------|
| Bio1      | Between species | 792.32         | 2  | 396.16      | 70.48  | 0.000 | T.contorta/T. wallichiana ( $p=0.524$ ) |
| Bio2      | Between species | 50.25          | 2  | 25.13       | 21.42  | 0.000 | T.contorta/T. mairei ( $p=0.143$ )      |
| Bio3      | Between species | 2452.35        | 2  | 1226.18     | 39.24  | 0.000 | $p=0.000$                               |
| Bio4      | Between species | 1327968.66     | 2  | 663984.33   | 65.65  | 0.000 | $p=0.000$                               |
| Bio5      | Between species | 306.76         | 2  | 153.38      | 16.62  | 0.000 | $p=0.000$                               |
| Bio6      | Between species | 1530.46        | 2  | 765.23      | 88.29  | 0.000 | T.contorta/T. wallichiana ( $p=0.999$ ) |
| Bio7      | Between species | 733.89         | 2  | 366.95      | 47.33  | 0.000 | $p=0.000$                               |
| Bio8      | Between species | 590.79         | 2  | 295.39      | 35.16  | 0.000 | $p=0.000$                               |
| Bio9      | Between species | 1237.42        | 2  | 618.71      | 77.21  | 0.000 | $p=0.000$                               |
| Bio10     | Between species | 235.11         | 2  | 117.55      | 16.29  | 0.000 | T.contorta/T. wallichiana ( $p=0.358$ ) |
| Bio11     | Between species | 1709.99        | 2  | 855.00      | 120.42 | 0.000 | $p=0.000$                               |
| Bio12     | Between species | 32690000.00    | 2  | 16350000.00 | 44.37  | 0.000 | $p=0.000$                               |
| Bio13     | Between species | 1718425.31     | 2  | 859212.66   | 31.04  | 0.000 | $p=0.000$                               |
| Bio14     | Between species | 2285.35        | 2  | 1142.68     | 29.74  | 0.000 | T.mairei/T. wallichiana ( $p=0.996$ )   |
| Bio15     | Between species | 17492.01       | 2  | 8746.00     | 34.98  | 0.000 | T.mairei/T. wallichiana ( $p=0.291$ )   |
| Bio16     | Between species | 12570000.00    | 2  | 6285132.67  | 35.76  | 0.000 | $p=0.000$                               |
| Bio17     | Between species | 91758.03       | 2  | 45879.02    | 55.71  | 0.000 | T.mairei/T. wallichiana ( $p=0.8$ )     |
| Bio18     | Between species | 9863941.93     | 2  | 4931970.96  | 28.04  | 0.000 | $p=0.000$                               |
| Bio19     | Between species | 479754.92      | 2  | 239877.46   | 75.14  | 0.000 | T.mairei/T. wallichiana ( $p=0.989$ )   |
