# Supplementary material
Source: publisher figshare collection journal article supplement (https://plos.figshare.com/articles/dataset/_/118985)
Supplement: Supplementary file [file 1]

## Supplementary Figure S6

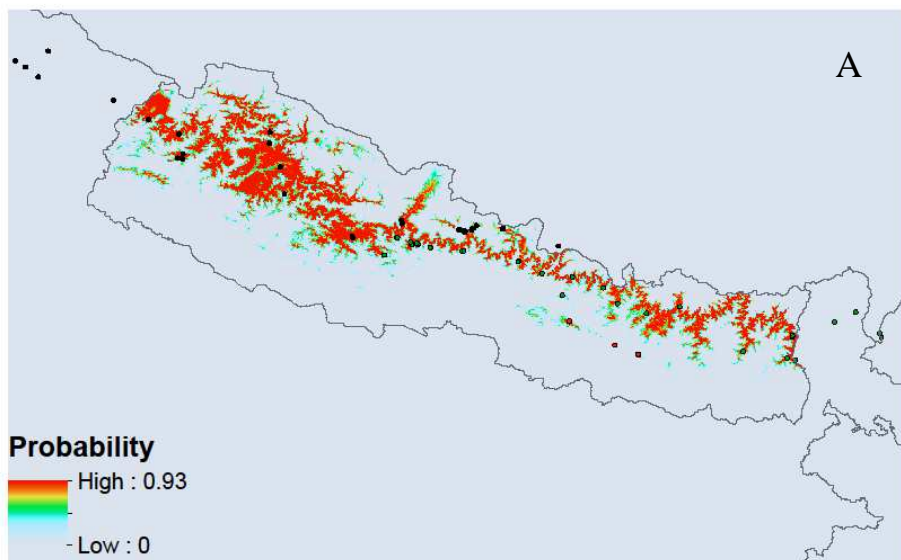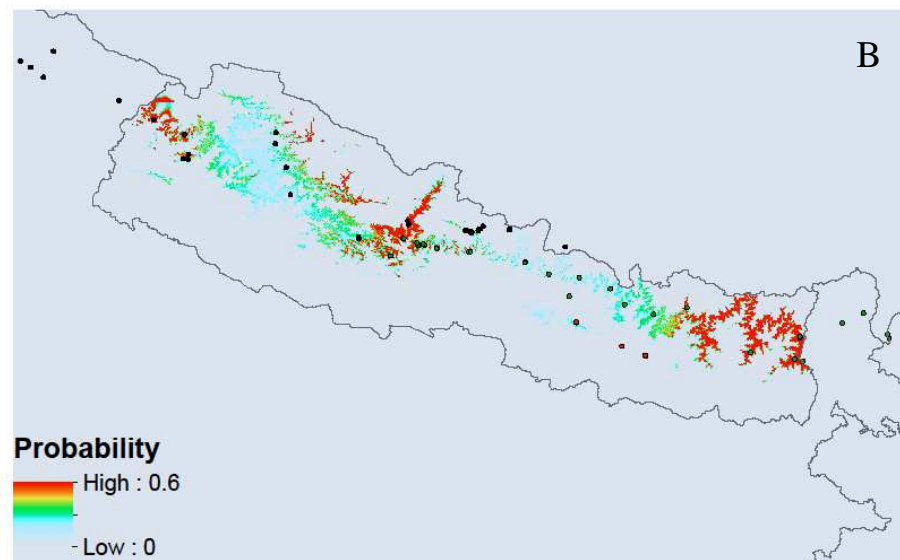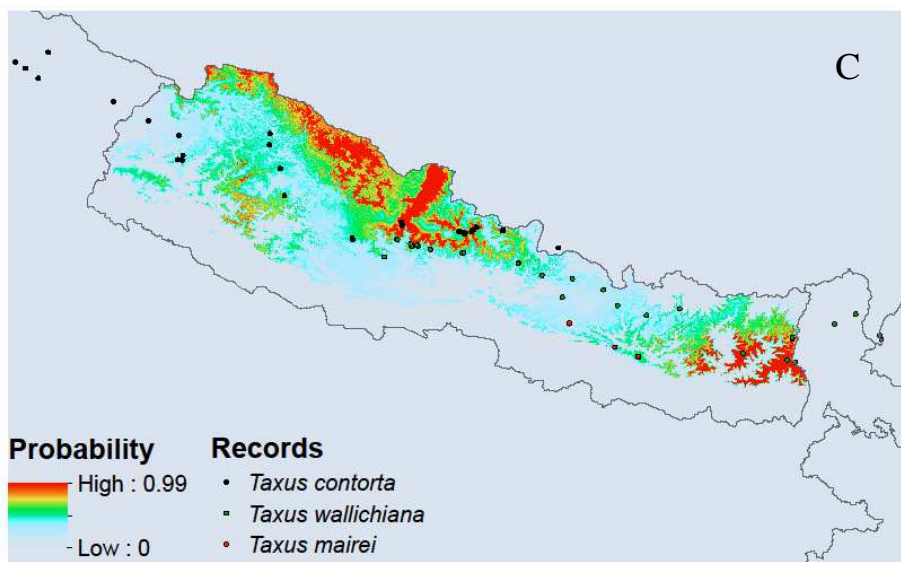

**Figure S6. Ecological niche models of yews in Nepal.** Comparison of ecological niche models for **A.** *T. contorta*, **B.** *T. wallichiana* and **C.** *T. mairei* developed on training data where Nepal was left out, and predicted to Nepal. The corresponding AUC values for these models are 0.858 (*T. contorta*), 0.926 (*T. wallichiana*) and 0.672 (*T. mairei*). When *T. contorta* is predicted by *T. wallichiana* and *T. mairei* the corresponding AUC values are 0.835 and 0.8 respectively. When *T. wallichiana* is predicted by *T. contorta* and *T. mairei* the AUC values are 0.871 and 0.706. Finally, when *T. mairei* is predicted by *T. contorta* and *T. wallichiana* the AUC values are 0.723 and 0.776. It should be noted that these AUC scores partly reflect differences in the training data available to the models. *T. mairei* is better predicted by *T. contorta* and *T. wallichiana*, as outside of Nepal the species has few occurrences in a comparable environment.
